# Supplementary material
Source: MDPI journal article supplement (https://www.mdpi.com/2075-4701/13/2/267)
Supplement: s1 [file s1 › metals-2160446-supplementary.pdf]

Article

# Prediction of Mechanical Properties and Optimization of Friction Stir Welded 2195 Aluminum Alloy Based on BP Neural Network

Fanqi Yu <sup>1,2</sup>, Yunqiang Zhao <sup>1,\*</sup>, Zhicheng Lin <sup>1,3</sup>, Yugang Miao <sup>2</sup>, Fei Zhao <sup>3,4</sup> and Yingchun Xie <sup>3,4</sup>

<sup>1</sup> China-Ukraine Institute of Welding, Guangdong Academy of Sciences, Guangdong Provincial Key Laboratory of Advanced Welding Technology, Guangzhou 510650, China

<sup>2</sup> National Key Laboratory of Science and Technology on Underwater Vehicle, Harbin Engineering University, Harbin 150001, China

<sup>3</sup> Ri Song Intelligent Technology Holding, Guangdong Provincial Key Laboratory of Robotics and Digital Intelligent Manufacturing Technology, Guangzhou 510535, China

<sup>4</sup> Product Development Department, Fiscaxia Industry Software Co., Ltd., Guangzhou 510535, China

\* Correspondence: yunqiangzhao@163.com

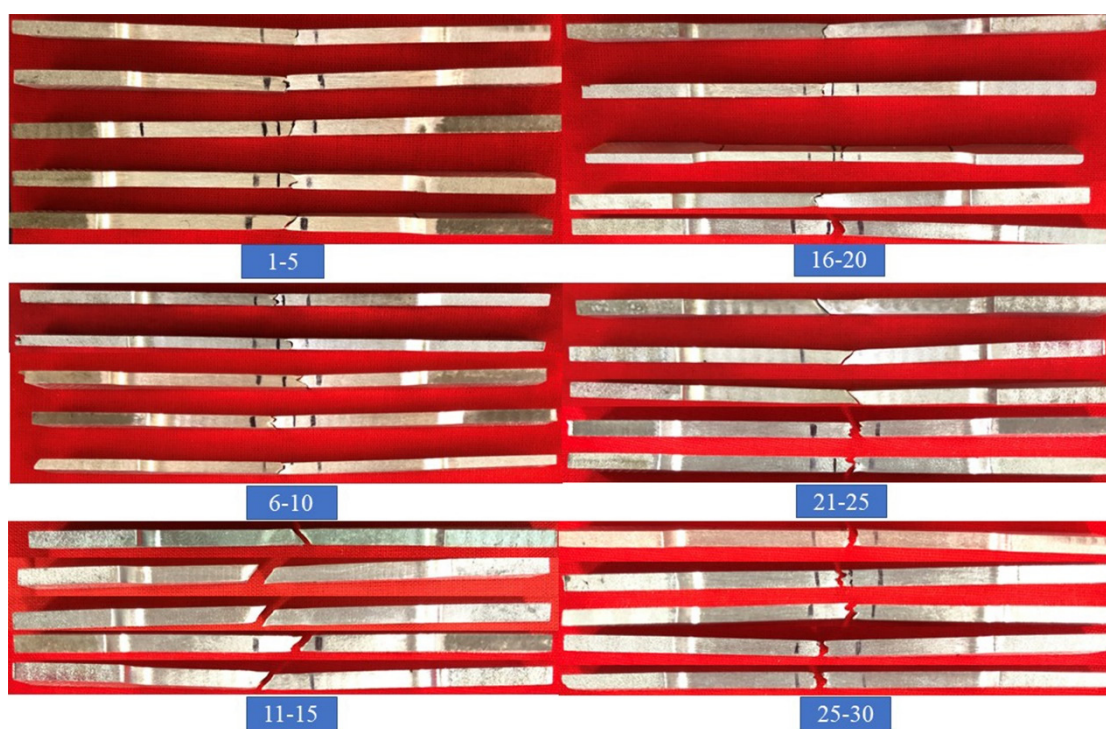

**Figure S1.** The image of the fractured specimen.

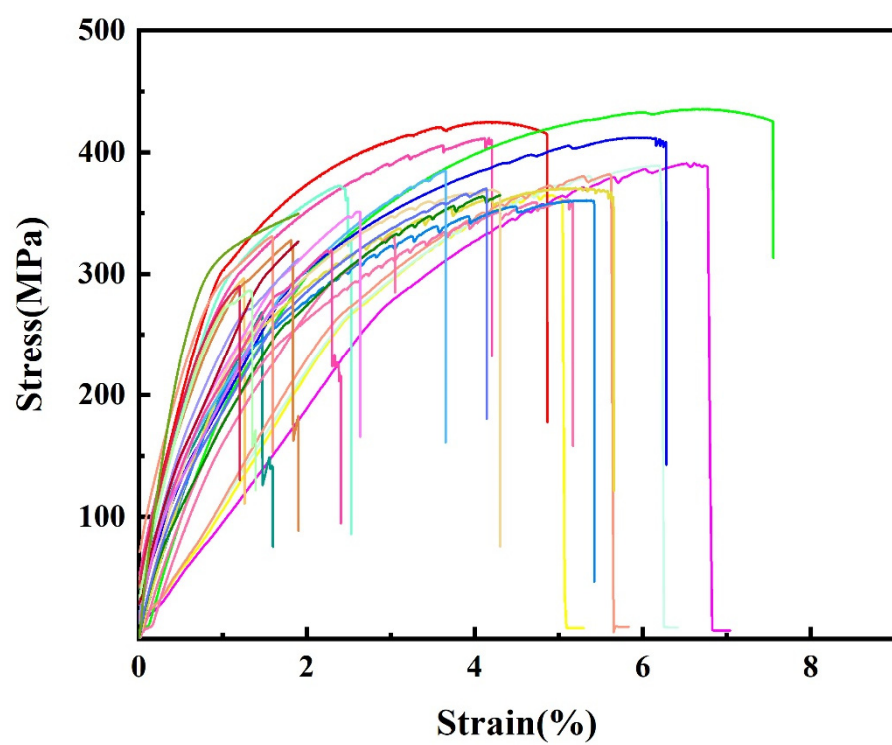

Figure S2. Stress-strain curve.
